# Supplementary material
Source: publisher figshare collection journal article supplement (https://acs.figshare.com/ndownloader/files/4751074)
Supplement: Supplementary file 1 [file 4751074]

# **A Cyanide-Bridged Single Molecule Magnet Constructed by Octacoordinated $[\text{W}(\text{CN})_6(\text{bpy})]^-$ Anion**

Jung Hee Yoon,<sup>†</sup> Jeong Hak Lim,<sup>†</sup> Hyoung Chan Kim,<sup>‡</sup> and Chang Seop Hong<sup>\*,†</sup>

Department of Chemistry and Center for Electro- and Photo-Responsive Molecules,  
Korea University, Seoul 136-701, Korea and Systems Research Team, Research &  
Development Division, Nuclear Fusion Research Center, Daejeon 305-333, Korea

## **Preparations**

[W(bpy)(CN)<sub>6</sub>]<sub>2</sub>[Mn(L)]<sub>2</sub>•3H<sub>2</sub>O (**1**): (AsPh<sub>4</sub>)[W(CN)<sub>6</sub>(bpy)] (0.091 mmol) dissolved in MeCN (15 mL) was added to a suspension of [MnL(H<sub>2</sub>O)]<sub>2</sub>(ClO<sub>4</sub>)<sub>2</sub>•H<sub>2</sub>O [L = N,N'-bis(2-hydroxyacetophenylidene)-1,2-diaminopropane] (0.046 mmol) in water (15 mL) with stirring for 20 min. The resultant clear violet solution was allowed to stand without perturbation in the dark, giving white and red crystals at the same time. The red crystals are collected by washing with MeCN and dried in air. Yield: 79%. Anal. Calcd for C<sub>35</sub>H<sub>31</sub>MnN<sub>10</sub>O<sub>3</sub>W: C, 47.85; H, 3.56; N, 15.94. Found: C, 47.49; H, 3.31; N, 16.18.

[W(bpy)(CN)<sub>6</sub>]<sub>2</sub>[Co(DMSO)<sub>4</sub>] (**2**): Addition of (AsPh<sub>4</sub>)[W(bpy)(CN)<sub>6</sub>] (0.16 mmol) in MeCN (15 mL) to Co(NO<sub>3</sub>)<sub>2</sub>•6H<sub>2</sub>O (0.080 mmol) in MeCN (15 mL), followed by DMSO (1 mL), afforded a red solution that was stirred for 1h. The filtered solution was left undisturbed in the dark, providing red crystals after 2 days. The crystals was washed with MeCN and dried in air. Yield: 40%. Anal. Calcd for C<sub>40</sub>H<sub>40</sub>CoN<sub>16</sub>O<sub>4</sub>W<sub>2</sub>; C, 35.23; H, 2.96; N, 16.43. Found: C, 35.14; H, 2.85; N, 16.39.

**Table S1.** Crystallographic Data for **1** and **2**

|                                                                      | <b>1</b>                                                           | <b>2</b>                                                                                         |
|----------------------------------------------------------------------|--------------------------------------------------------------------|--------------------------------------------------------------------------------------------------|
| chem formula                                                         | C <sub>35</sub> H <sub>31</sub> MnN <sub>10</sub> O <sub>3</sub> W | C <sub>20</sub> H <sub>20</sub> Co <sub>0.5</sub> N <sub>8</sub> O <sub>2</sub> S <sub>2</sub> W |
| formula weight                                                       | 878.49                                                             | 681.88                                                                                           |
| crystal system                                                       | monoclinic                                                         | triclinic                                                                                        |
| space group                                                          | P2 <sub>1</sub> /c                                                 | P-1                                                                                              |
| <i>a</i> (Å)                                                         | 13.0326(4)                                                         | 8.8017(3)                                                                                        |
| <i>b</i> (Å)                                                         | 13.2676(4)                                                         | 10.7152(4)                                                                                       |
| <i>c</i> (Å)                                                         | 20.8505(7)                                                         | 14.1133(5)                                                                                       |
| $\alpha$ (°)                                                         | 90                                                                 | 77.0020(10)                                                                                      |
| $\beta$ (°)                                                          | 91.7410(10)                                                        | 77.5210(10)                                                                                      |
| $\gamma$ (°)                                                         | 90                                                                 | 74.4800(10)                                                                                      |
| <i>V</i> (Å <sup>3</sup> )                                           | 3603.6(2)                                                          | 1232.31(8)                                                                                       |
| <i>Z</i>                                                             | 4                                                                  | 2                                                                                                |
| <i>d</i> <sub>calc</sub> (g cm <sup>-3</sup> )                       | 1.619                                                              | 1.838                                                                                            |
| $\mu$ (mm <sup>-1</sup> )                                            | 3.589                                                              | 5.215                                                                                            |
| <i>F</i> (000)                                                       | 1736                                                               | 663                                                                                              |
| $\theta$ range (°)                                                   | 1.56 to 28.38                                                      | 1.50 to 28.36                                                                                    |
| reflections collected                                                | 57261                                                              | 20048                                                                                            |
| unique reflections                                                   | 8869                                                               | 6050                                                                                             |
| no. of parameters                                                    | 458                                                                | 305                                                                                              |
| <i>R</i> 1 <sup><i>a</i></sup> [ <i>I</i> >2 $\sigma$ ( <i>I</i> )]  | 0.0318                                                             | 0.0484                                                                                           |
| <i>wR</i> 2 <sup><i>b</i></sup> [ <i>I</i> >2 $\sigma$ ( <i>I</i> )] | 0.0722                                                             | 0.1001                                                                                           |

$$^a R1 = \sum ||F_O| - |F_C|| / \sum |F_C|, \quad ^b wR2 = [\sum w(F_O^2 - F_C^2)^2 / \sum w(F_O^2)^2]^{1/2}.$$

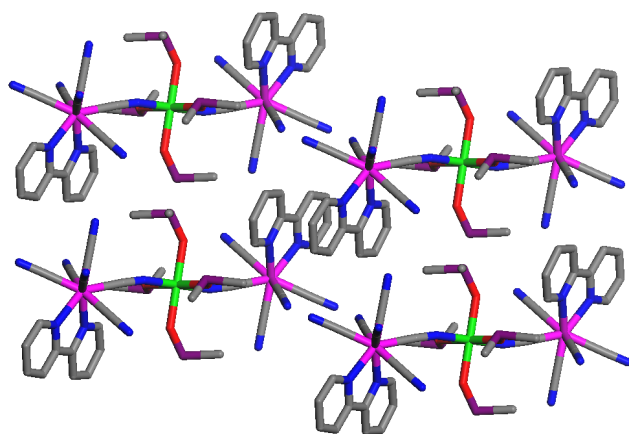

**Figure S1.** Extended structure of **2** showing intermolecular  $\pi$ - $\pi$  interactions.

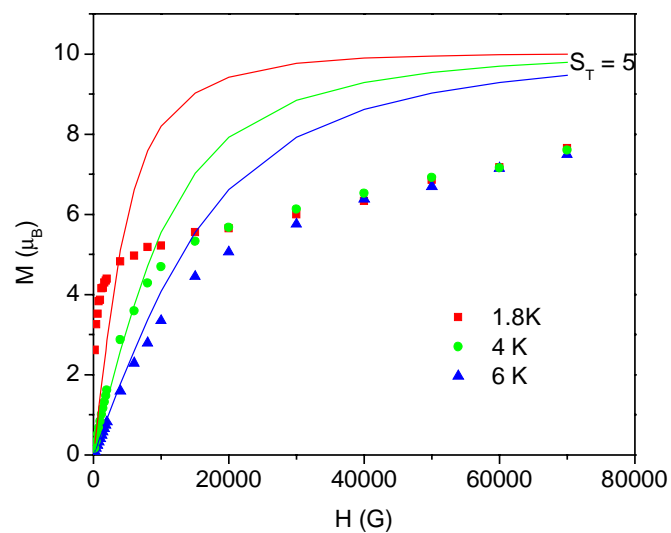

**Figure S2.** Plots of  $M$  versus  $H$  for **1**. The solid lines represent the Brillouin curves calculated from  $S_T = 5$ . The colors indicate temperatures of 1.8 K (red), 4 K (green), and 6 K (blue). At 4 K, the magnetization data at fields up to 0.8 T coincide with the Brillouin curve.

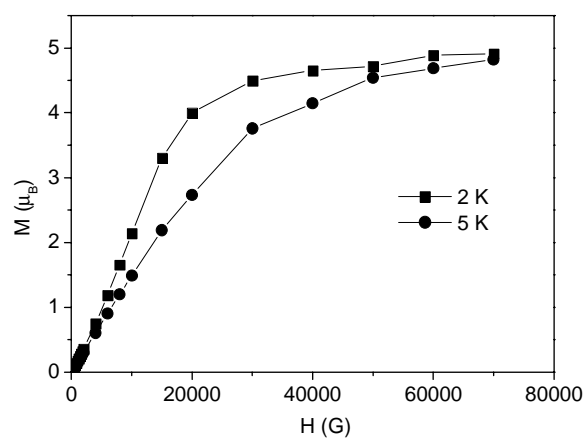

**Figure S3.** Plot of  $M$  versus  $H$  for **2** at 2 and 5 K.

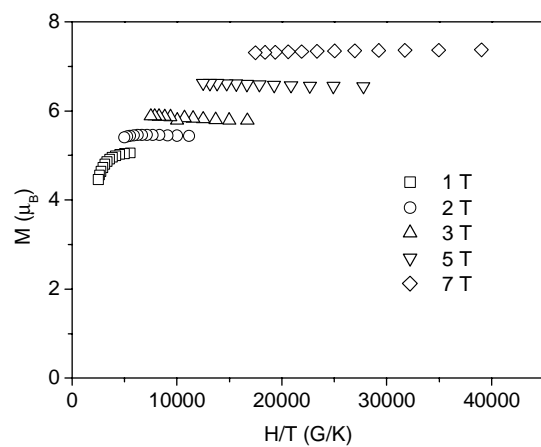

**Figure S4.** Plot of the magnetization  $M$  versus the ratio of the magnetic field  $H$  to temperature ( $T = 1.8 \sim 4.0$  K) for **1**. The  $M$  is decreasing with  $H/T$  at 2 - 4 T. They are unusual and perhaps there are very weak antiferromagnetic interactions between molecules.

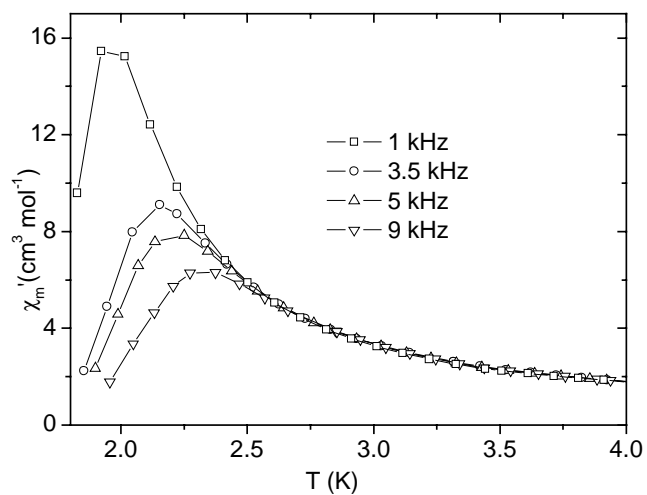

(a)

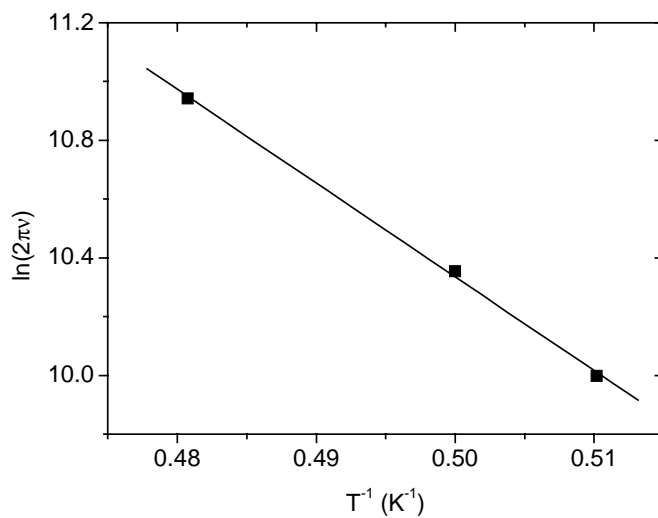

(b)

**Figure S5.** (a) In-phase ac susceptibility data ( $\chi'_m$ ) versus temperature plot for **1** at the indicated frequencies. (b) Arrhenius plot for **1**. The solid line stands for the least-squares fit of maximums in  $\chi''_m$  to the Arrhenius equation.



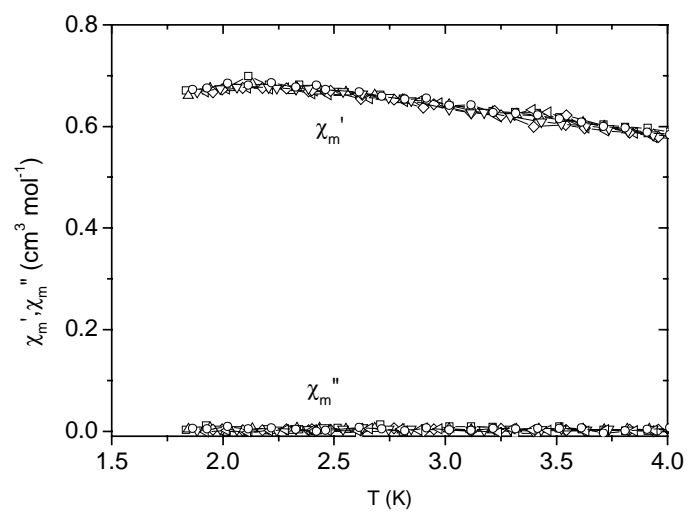

**Figure S6.** In-phase ( $\chi_m'$ ) and out-of-phase ( $\chi_m''$ ) ac susceptibility data for **2** in the frequency range of 500 – 9000 Hz in an ac field of 10 G.

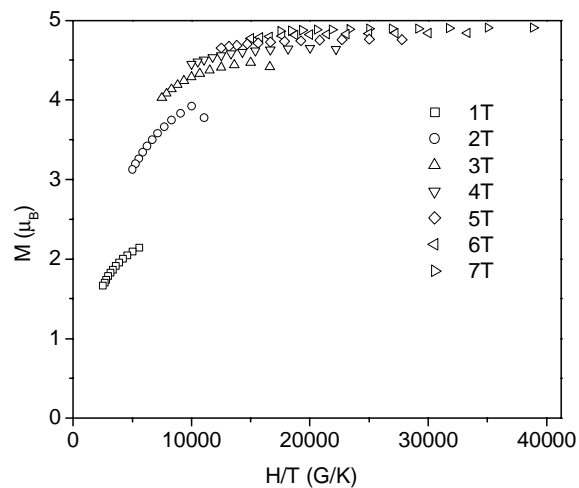

**Figure S7.** Plot of the magnetization  $M$  versus the ratio of the magnetic field  $H$  to temperature ( $T = 1.8 \sim 4.0$  K) for **2**. The non-superimposed magnetization data reveal the existence of zero-field splitting arising from the octahedral Co(II) ion. The  $M$  is decreasing with  $H/T$  at 2 T. They are unusual and there are very weak antiferromagnetic interactions between molecules.
